# Supplementary material
Source: PubMed Central journal article supplement (PMC3801034)
Supplement: 1316852110_pnas.201316852SI.pdf [file 1316852110_pnas.201316852SI.pdf]

# Supporting Information

Jeong et al. 10.1073/pnas.1316852110

## SI Materials and Methods

**Reagents.** *Pseudomonas* exotoxin A was purchased from List Biological Laboratories, and FP59 was a generous gift from S. Leppla (National Institute of Allergy and Infectious Diseases/National Institutes of Health, Bethesda). Anti-capn2 antibody was purchased from Cell Signaling Technology. The mouse calpain-2 (capn2) cDNA construct (pCMV6-capn2) was purchased from OriGene.

**Overexpression of Capn2.** The mouse capn2 ORF was amplified from the pCMV6-capn2 cDNA construct (OriGene) using primers 5'-AACCGGATCGCTACCATGGCGGGCAT and 5'-TCCAGACTAGTAACTTCAGAGT and was cloned into lentiviral vector, pLenti-CMV-BSD. For capn2 overexpression, RAW264.7 cells were infected with the lentivirus containing pLenti-CMV-BSD-capn2 or empty vector pLenti-CMV-BSD, followed by selection using 2 µg/mL of blasticidin S (Invitrogen).

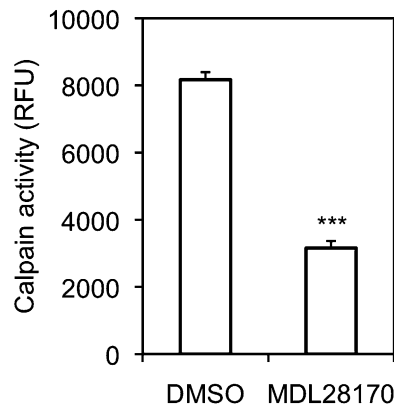

**Fig. S1.** Effect of MDL28170 on calpain activity. RAW264.7 cells were treated with 40 µM MDL28170 or 0.1% (vol/vol) DMSO for 2 h. Calpain activity was determined in total-cell lysates using synthetic fluorogenic substrates as described in *Materials and Methods*. The bar graph shows the mean ± SD for values obtained in three independent experiments. \*\*\* $P < 0.001$ . RFU, relative fluorescence units.

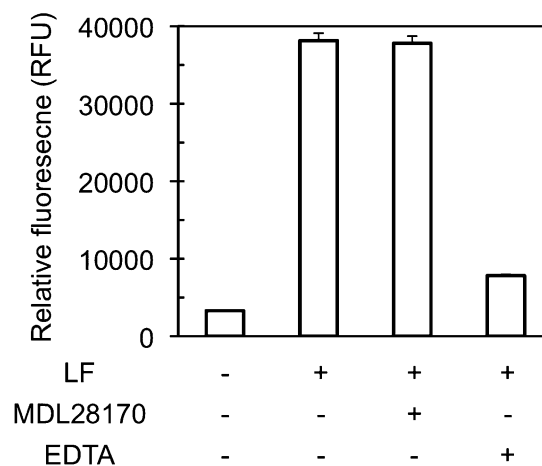

**Fig. S2.** Absence of effect of MDL28170 on lethal factor (LF) enzymatic activity. LF enzymatic activity was determined using a FRET-based substrate, MAPKKide (List Biological Laboratories). Cleavage of the quenched fluorescent substrate by LF is proportional to an increase in fluorescence intensity (1). LF was preincubated with 40 µM MDL28170 or 5 mM EDTA (an LF inhibitor) at room temperature for 30 min. Then 30 µM MAPKKide (o-Abz/Dnp) was incubated with or without 10 nM LF in 20 mM Hepes (pH 8.2) at 37 °C for 30 min, and the fluorescence signal was measured at 420 nm following excitation at 320 nm. Data shown are the mean ± SD from three independent experiments.

1. Kocer SS, Walker SG, Zerler B, Golub LM, Simon SR (2005) Metalloproteinase inhibitors, nonantimicrobial chemically modified tetracyclines, and ilomastat block *Bacillus anthracis* lethal factor activity in viable cells. *Infect Immun* 73(11):7548–7557.



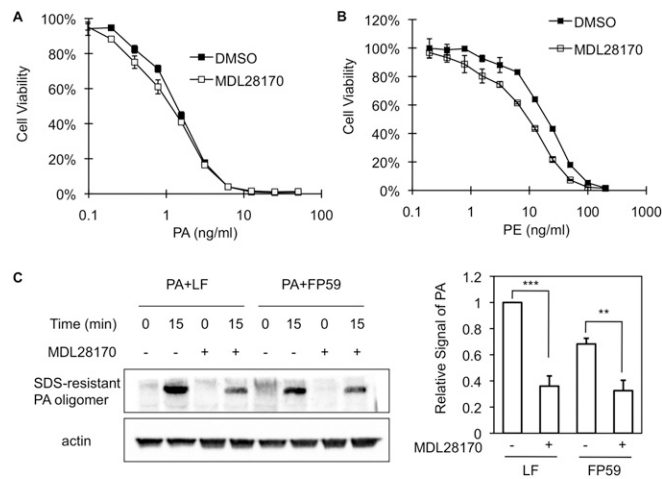

**Fig. S6.** Effect of MDL28170 on macrophage susceptibility to PA-FP59 and *Pseudomonas aeruginosa* exotoxin A (PE toxin). (A and B) Effect of MDL28170 on cellular susceptibility to PA-FP59 or to PE toxin. RAW264.7 cells were pretreated with 40  $\mu$ M MDL28170 or 0.1% DMSO for 1 h before exposure to serially diluted PA in the presence of 50 ng/mL FP59 (A) or serially diluted PE toxin (B). After 1 d of toxin treatment, cell viability was determined by 3-[4,5-dimethylthiazol-2-yl]-2,5-diphenyltetrazolium bromide (MTT) assay. Data are from one representative experiment ( $n = 3$ ) carried out in triplicate. LD<sub>50</sub> values for PA of DMSO-treated cells and MDL28170-treated cells in the presence of FP59 are  $1.36 \pm 0.02$  ng/mL and  $1.12 \pm 0.07$  ng/mL, respectively ( $P > 0.05$ ). LD<sub>50</sub> values for PE in DMSO-treated cells and MDL28170-treated cells are  $18.93 \pm 0.01$  ng/mL and  $8.94 \pm 0.21$  ng/mL, respectively ( $P < 0.01$ ). (C) Effect of MDL28170 on PA endocytosis in the presence of LF or FP59. Cells were incubated with 80 MDL28170 for 1 h, followed by exposure to 0.5  $\mu$ g/mL PA in the presence of 0.25  $\mu$ g/mL LF or FP59 at 4  $^{\circ}$ C for 1 h and then were shifted to 37  $^{\circ}$ C. After 15 min, the cells were collected and analyzed by Western blotting using anti-PA antibody as probe. Relative amounts of SDS-sensitive PA oligomer were determined by normalization against  $\beta$ -actin in two independent experiments. \*\* $P < 0.01$ ; \*\*\* $P < 0.001$ .
